# Supplementary material for: Iron-mediated soil carbon response to water-table decline in an alpine wetland
Source: PubMed Central journal article supplement (PMC5490263; doi:10.1038/ncomms15972), 2017-06-26
Supplement: ncomms15972-s1.pdf [file ncomms15972-s1.pdf]

File name: Supplementary Information

Description: Supplementary Figures, Supplementary Tables and Supplementary References

**Supplementary Table 1:** Summary of published results on extracellular enzyme activities in response to water-table decline (WTD) or drought.

| Publication                     | Eco-type              | Dominant vegetation                                                                        | Soil type                                       | Soil pH   | SOC (%)  | Fe(II)<br>(mg g <sup>-1</sup> soil) | Result                                                                                               |
|---------------------------------|-----------------------|--------------------------------------------------------------------------------------------|-------------------------------------------------|-----------|----------|-------------------------------------|------------------------------------------------------------------------------------------------------|
| Freeman et al. <sup>1</sup>     | Peatland              | <i>Sphagnum</i> and <i>Juncus</i> species                                                  | Peat                                            | 4.68–5.02 | na       | na                                  | Phenol oxidative activity <b>increased</b> with O <sub>2</sub> (WTD or drought)                      |
| Freeman et al. <sup>2</sup>     | Riparian gully mire   | <i>Sphagnum</i>                                                                            | Peat                                            | 4.5       | na       | na                                  |                                                                                                      |
| Fenner and Freeman <sup>3</sup> | Ombrotrophic peatland | <i>Sphagnum</i>                                                                            | Peat                                            | 4–4.8     | ~50*     | na                                  |                                                                                                      |
| Romanowicz et al. <sup>4</sup>  | Oligotrophic bog      | <i>Sphagnum</i> , <i>Polytrichum</i> species, sedges and ericaceous shrubs                 | Peat                                            | 4         | na       | na                                  |                                                                                                      |
| Hall and Silver <sup>5</sup>    | Humid tropical forest | Trees ( <i>Dacryodes excelsa</i> , <i>Prestoea montana</i> , <i>Cyrtilla racemiflora</i> ) | Ultisols, Oxisols, Inceptisols                  | 4.3–5.3   | na       | 0.05–7.39                           | Phenol oxidative or hydrolytic enzyme activity <b>decreased</b> with O <sub>2</sub> (WTD or drought) |
| Hall et al. <sup>6</sup>        |                       |                                                                                            |                                                 | 4.3–5.3   | 2.8–16.7 | 0.11–4.11                           |                                                                                                      |
| Liu et al. <sup>7</sup>         | Rice paddy field      | Rice ( <i>Oryza sativa</i> L.)                                                             | Silt-clay Ultisol                               | 5.9       | 1.1      | 0.2–1.7                             |                                                                                                      |
| Toberman et al. <sup>8</sup>    | Boreal mire peatland  | Sedge, <i>Sphagnum</i> and <i>Juncus</i> species                                           | Peat                                            | 4.0–4.7   | na       | na                                  |                                                                                                      |
| Toberman et al. <sup>9</sup>    | Upland heathland      | Shrub ( <i>Calluna vulgaris</i> L.)                                                        | Peaty Podsol                                    | 3.9       | ~45*     | na                                  |                                                                                                      |
| Toberman et al. <sup>10</sup>   | Boreal mire peat      | Sedge, trees, moss                                                                         | Peat                                            | 4.0–5.5   | na       | na                                  |                                                                                                      |
| This study                      | Alpine wetland        | Sedge ( <i>Carex</i> )                                                                     | Organic layers of silty clay Mat-Cryic Cambisol | 6–8       | 7.5–18.5 | 0.68–7.20                           |                                                                                                      |

\* Estimated as 50% of organic matter content. SOC: soil organic carbon; Fe(II): ferrous iron.

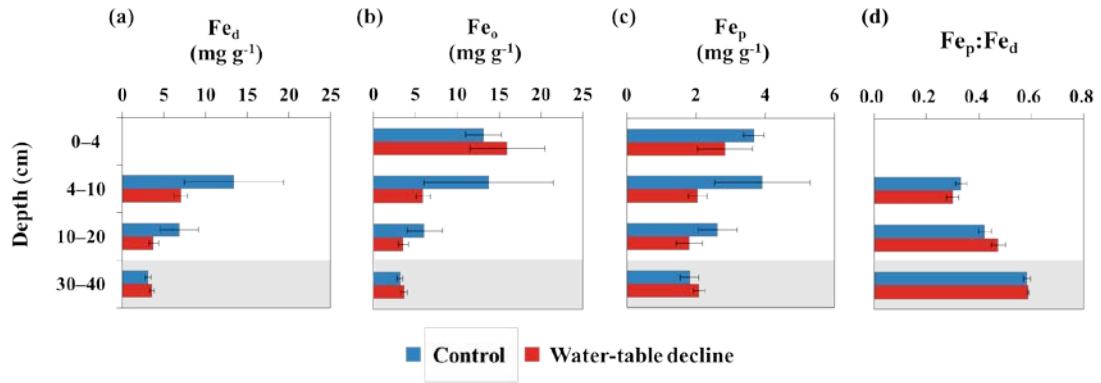

**Supplementary Figure 1:** Contents of different forms of extractable iron (Fe) in the wetland soils (< 53 μm). (a) Dithionite-extractable Fe (Fe<sub>d</sub>); (b) oxalate-extractable Fe (Fe<sub>o</sub>); (c) pyrophosphate-extractable Fe (Fe<sub>p</sub>); (d) ratio of Fe<sub>p</sub>:Fe<sub>d</sub> indicating degree of Fe complexation with organic matter. Error bars represent standard error of mean (s.e.m.; n = 4). Upper- and lower-case letters denote difference among soil depths in the control and water-table decline treatment, respectively (*p* < 0.05). Fe<sub>d</sub> was not measured for 0–4 cm due to the limited sample size.

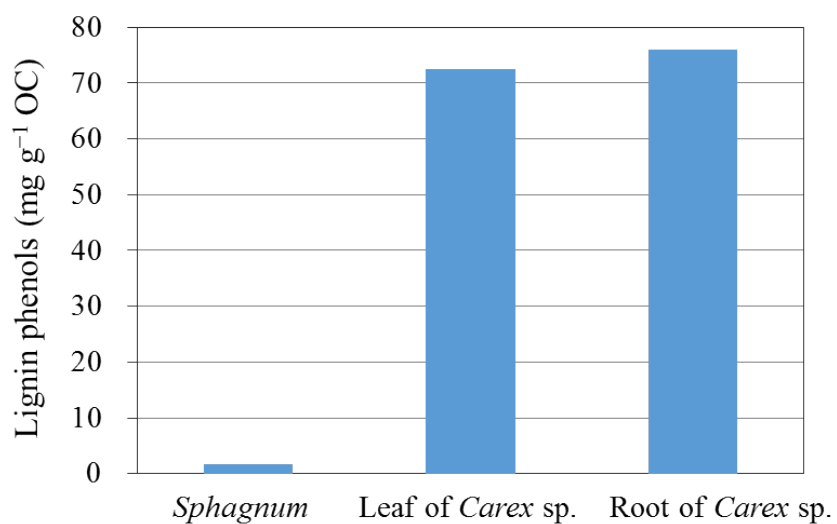

**Supplementary Figure 2:** Organic carbon (OC)-normalized lignin phenol concentrations in *Sphagnum* and sedge (*Carex* sp.) tissues collected from wetlands in southern China and the Haibei Station.

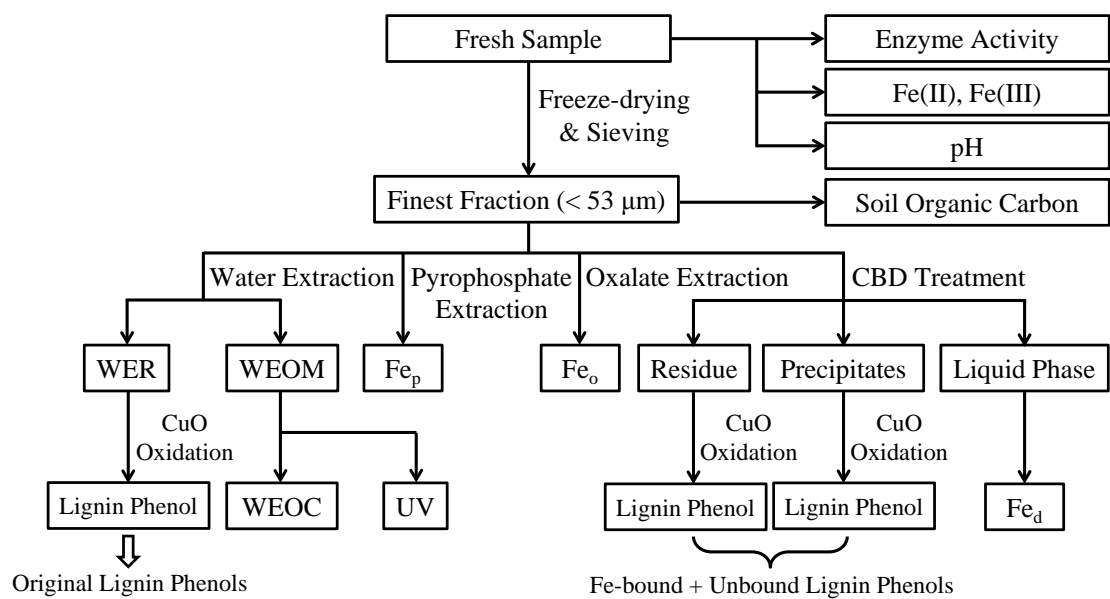

**Supplementary Figure 3:** Scheme of sample treatments and analyses. WER: water-extracted residue; WEOM: water-extractable organic matter; WEOC: water-extractable organic carbon; CBD: citrate-bicarbonate-dithionite method; Fe(II): ferrous iron; Fe(III): ferric iron; Fe<sub>p</sub>: pyrophosphate-extractable iron; Fe<sub>o</sub>: oxalate-extractable iron; Fe<sub>d</sub>: dithionite-extractable iron.

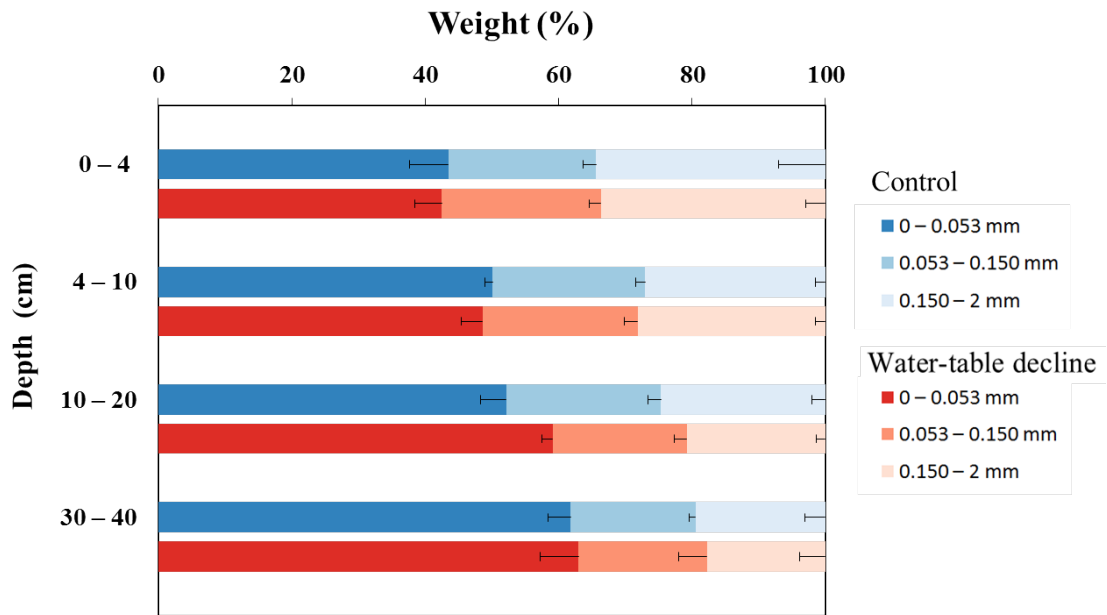

**Supplementary Figure 4:** Weight percentage of each grain size fraction in the control and water-table decline treated soils. Error bars represent standard error of mean (s.e.m.; n = 4).

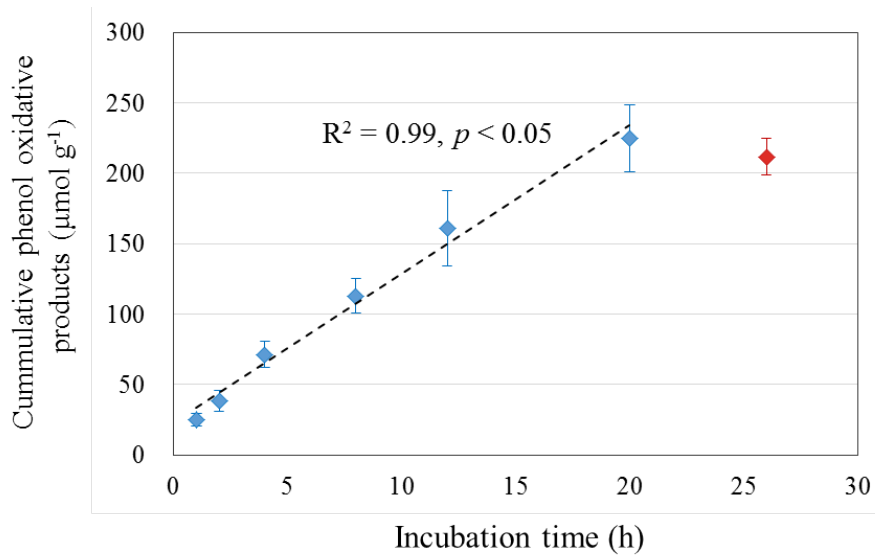

**Supplementary Figure 5:** Changes of cumulative phenol oxidative products in the surface wetland soil with increasing incubation time for the assay of phenol oxidative activities (mean  $\pm$  s.e.m.; n = 3). Note that phenol oxidative products increased linearly with time within 20 h.

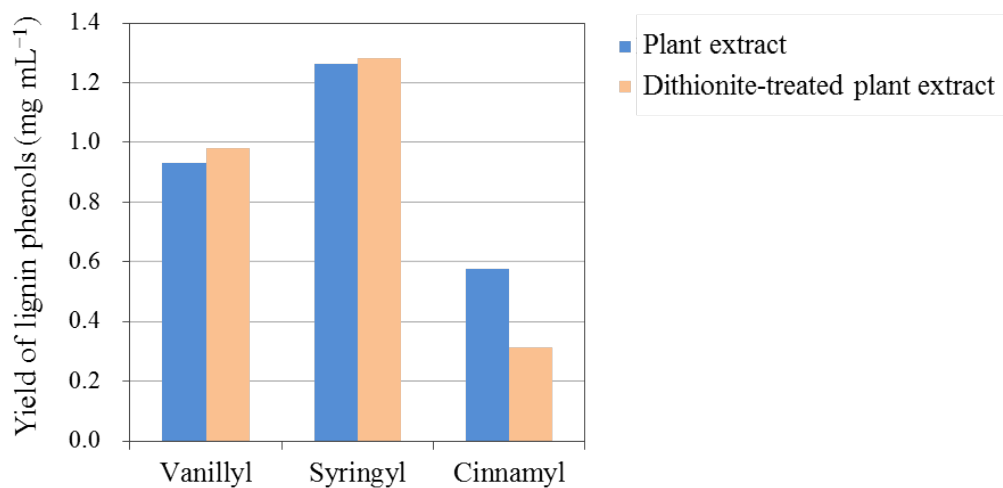

**Supplementary Figure 6:** Lignin phenol yields of untreated and dithionite-treated water extracts from oak leaves in the preliminary experiment.



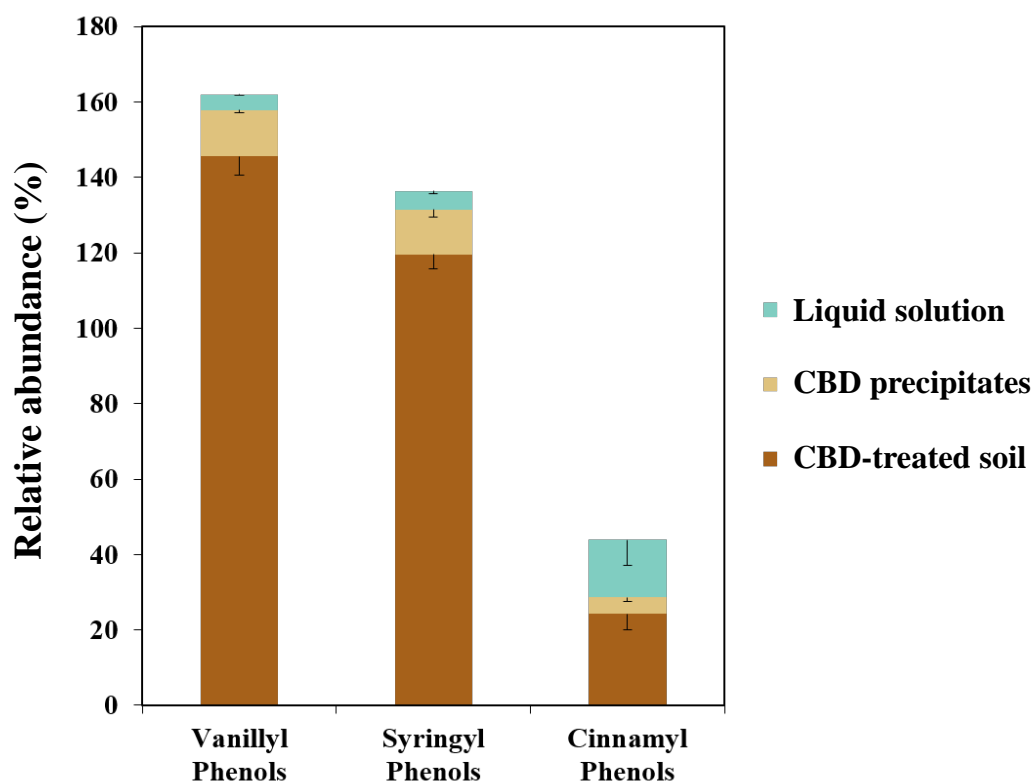

**Supplementary Figure 7:** Relative abundance of lignin phenols in different phases after the citrate-bicarbonate-dithionite (CBD) treatment compared with that in the original control soil at 30–40 cm. Error bars represent standard error of mean (s.e.m.;  $n = 4$ ). Lignin in the liquid solution was concentrated using  $C_{18}$  solid phase extraction cartridges as described in the preliminary experiment. Note that cinnamyl phenols were relatively more abundant in the solution than vanillyl and syringyl phenols, indicating a high solubility and potential to loss during the CBD treatment.

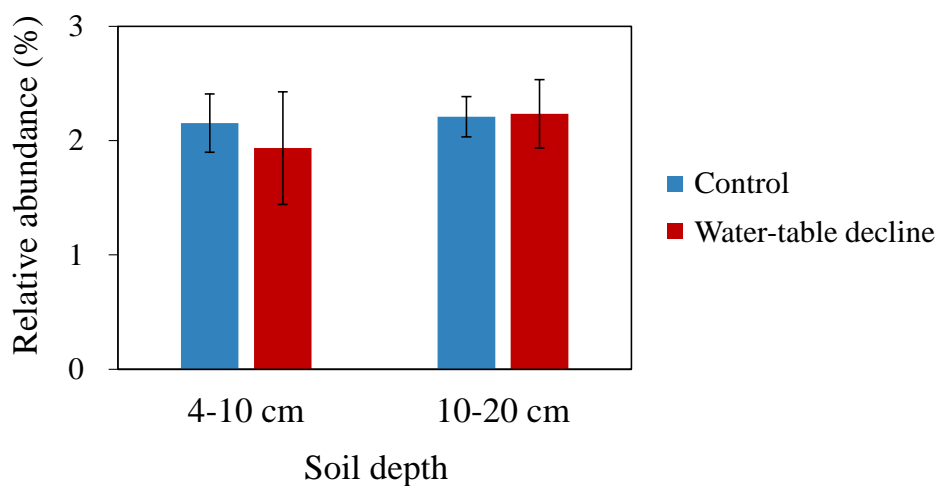

**Supplementary Figure 8:** Relative abundance of lignin phenols in the liquid solution after the citrate-bicarbonate-dithionite (CBD) treatment compared with that in the original soil at 4–10 and 10–20 cm in both control and water-table decline treatments. Errors represent standard error of mean (s.e.m.; n = 4).

## Supplementary References

1. Freeman, C., Liska, G., Ostle, N. J., Lock, M. A., Reynolds, B. & Hudson, J. Microbial activity and enzymic decomposition processes following peatland water table drawdown. *Plant Soil* **180**, 121–127 (1996).
2. Freeman, C., Ostle, N. J., Fenner, N. & Kang, H. A regulatory role for phenol oxidase during decomposition in peatlands. *Soil Biol. Biochem.* **36**, 1663–1667 (2004).
3. Fenner, N. & Freeman, C. Drought-induced carbon loss in peatlands. *Nat. Geosci.* **4**, 895–900 (2011).
4. Romanowicz, K. J., Kane, E. S., Potvin, L. R., Daniels, A. L., Kolka, R. K. & Lilleskov, E. A. Understanding drivers of peatland extracellular enzyme activity in the PEATcosm experiment: mixed evidence for enzymic latch hypothesis. *Plant Soil* **397**, 371–386 (2015).
5. Hall, S. J. & Silver, W. L. Iron oxidation stimulates organic matter decomposition in humid tropical forest soils. *Glob. Change Biol.* **19**, 2804–2813 (2013).
6. Hall, S. J., Treffkorn, J. & Silver, W. L. Breaking the enzymatic latch: impacts of reducing conditions on hydrolytic enzyme activity in tropical forest soils. *Ecology* **95**, 2964–2973 (2014).
7. Liu, S. *et al.* Flooding effects on soil phenol oxidase activity and phenol release during rice straw decomposition. *J. Plant Nutr. Soil Sci.* **177**, 541–547 (2014).
8. Toberman, H., Freeman, C., Artz, R. R. E., Evans, C. D. & Fenner, N. Impeded drainage stimulates extracellular phenol oxidase activity in riparian peat cores. *Soil Use Manage.* **24**, 357–365 (2008).
9. Toberman, H., Freeman, C., Artz, R. R. E., Evans, C. D. & Fenner, N. Summer drought effects upon soil and litter extracellular phenol oxidase activity and soluble carbon release in an upland *Calluna* heathland. *Soil Biol. Biochem.* **40**, 1519–1532 (2008).
10. Toberman, H. *et al.* Long-term drainage for forestry inhibits extracellular phenol oxidase activity in Finnish boreal mire peat. *Eur. J. Soil Sci.* **61**, 950–957 (2010).
